# Supplementary material for: A comparative study of carbazole-based thermally activated delayed fluorescence emitters with different steric hindrance
Source: Royal Society of Chemistry journal article supplement (doi:10.1039/c7tc00681k), 2017-01-01
Supplement: c7tc00681k1.pdf [file c7tc00681k1.pdf]

## Supporting Information

### A comparative study on carbazole-based thermally activated delayed fluorescence emitters with different steric hindrance

Kai Wang, Cai-Jun Zheng,\* Wei Liu, Yi-Zhong Shi, Ke Liang, Ming Zhang, Xue-Mei Ou and Xiao-Hong Zhang\*

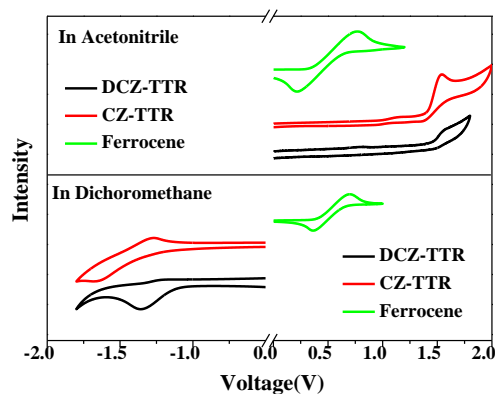

**Figure S1.** Cyclic voltammety of ferrocence, CZ-TTR and DCZ-TTR in acetonitrile and dichloromethane.

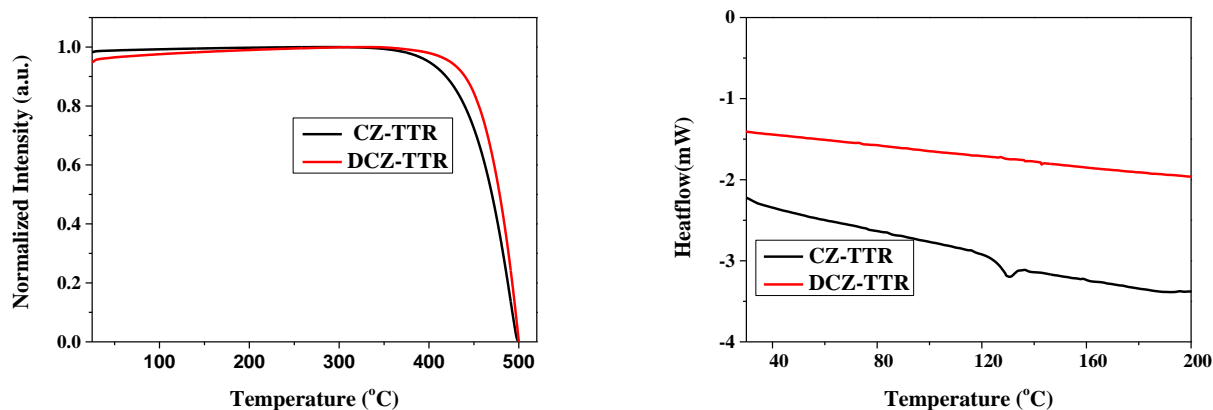

**Figure S2.** TGA (left) and DSC (right) thermograms of CZ-TTR and DCZ-TTR.

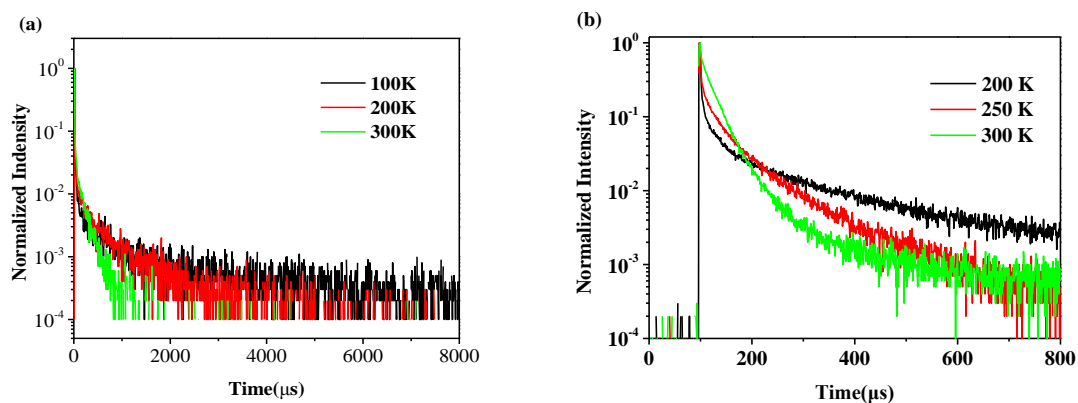

**Figure S3.** Transient PL decay curves for delayed emission of a) 10 wt% CZ-TTR and b) 6.5 wt% DCZ-TTR doped mCP film. (Excitation wavelength was 300 nm)

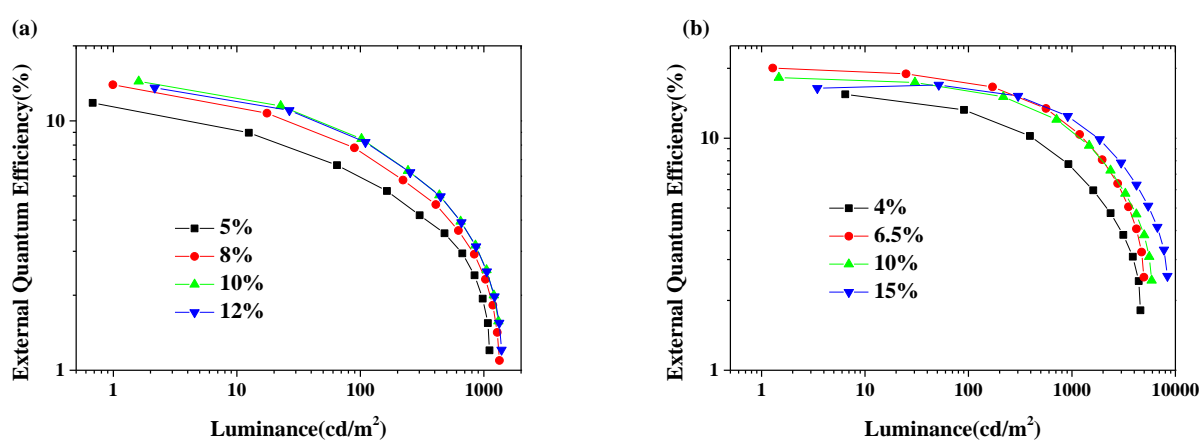

**Figure S4.** The device optimizations for (a) CZ-TTR and (b) DCZ-TTR.

**Table S1.** EL performances of the devices based on CZ-TTR and DCZ-TTR.

| Device  | $V_{on}^{[a]}$<br>(V) | $EQE_{max}$<br>(%) | $CE_{max}$<br>(cd/A) | $PE_{max}$<br>(lm/W) | $\lambda_{max}$<br>(nm) | FWHM<br>(nm) | CIE<br>(x, y) |
|---------|-----------------------|--------------------|----------------------|----------------------|-------------------------|--------------|---------------|
| CZ-TTR  | 3.1                   | 14.4               | 32.5                 | 32.9                 | 492                     | 101          | (0.21,0.35)   |
| DCZ-TTR | 3.2                   | 20.1               | 59.6                 | 58.5                 | 512                     | 92           | (0.25,0.50)   |

[a] Turn on voltage obtained at 1  $cd/m^2$ .

**Table S2.** Kinetic parameters of CZ-TTR and DCZ-TTR.

| Emitter | $\tau_p^{[a]}$<br>[ns] | $\tau_d^{[b]}$<br>[ $\mu$ s] | $\Phi_F$<br>[%]     | $\Phi_{TADF}$<br>[%] | $k_p$<br>[s <sup>-1</sup> ] | $k_d$<br>[s <sup>-1</sup> ] | $k_r^S$<br>[s <sup>-1</sup> ] | $k_{ISC}$<br>[s <sup>-1</sup> ] | $k_{RISC}$<br>[s <sup>-1</sup> ] | $k_{nr}^T$<br>[s <sup>-1</sup> ] |
|---------|------------------------|------------------------------|---------------------|----------------------|-----------------------------|-----------------------------|-------------------------------|---------------------------------|----------------------------------|----------------------------------|
| CZ-TTR  | 69.6                   | 28.1                         | 29.4 <sup>[c]</sup> | 27.3 <sup>[c]</sup>  | $1.4 \times 10^7$           | $3.6 \times 10^4$           | $4.2 \times 10^6$             | $1.0 \times 10^7$               | $4.7 \times 10^4$                | $2.19 \times 10^4$               |
|         |                        |                              | 48.8 <sup>[d]</sup> | 45.4 <sup>[d]</sup>  |                             |                             | $7.0 \times 10^6$             | $7.4 \times 10^6$               | $6.5 \times 10^4$                | $4.0 \times 10^3$                |
|         |                        |                              | 5.7 <sup>[c]</sup>  | 41.5 <sup>[c]</sup>  |                             |                             | $1.8 \times 10^6$             | $3.0 \times 10^7$               | $3.0 \times 10^5$                | $2.17 \times 10^4$               |
| DCZ-TTR | 31.7                   | 25.8                         | 12.0 <sup>[d]</sup> | 88.0 <sup>[d]</sup>  | $3.2 \times 10^7$           | $3.9 \times 10^4$           | $3.8 \times 10^6$             | $2.8 \times 10^7$               | $3.2 \times 10^5$                | 0                                |
|         |                        |                              |                     |                      |                             |                             |                               |                                 |                                  |                                  |

[a] Calculated using single-exponential decay fitting for prompt components in the range of 200 ns; [b] Calculated using triple-exponential decay fitting for delayed components in the range of 800  $\mu$ s; [c] Estimated from the PLQY value in air; [d] Estimated from the device EQE assuming a light out-coupling efficiency of about 20%.
